# Supplementary material
Source: Springer Nature journal article supplement (https://www.springermedizin.de/resource/supplementary/12885_2011_2823_MOESM11_ESM.pdf/9462068)

**A**

---

| 24H |  | 48H |  | 72H |  |
|-----|--|-----|--|-----|--|
|-----|--|-----|--|-----|--|

---

|   |   |   |   |   |   |
|---|---|---|---|---|---|
| - | + | - | + | - | + |
|---|---|---|---|---|---|

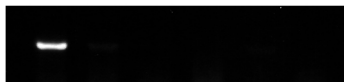

MMP-9

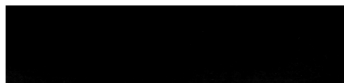

MMP-2

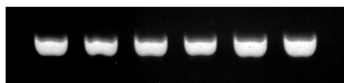

TIMP-1

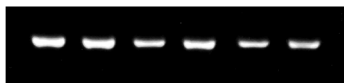

TIMP-2

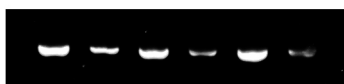

NCL

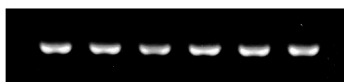

NPM

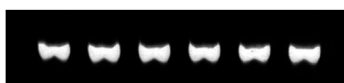

GAPDH

**B**

---

| Nucant Dose |  |  |  |
|-------------|--|--|--|
|-------------|--|--|--|

---

|   |   |   |   |
|---|---|---|---|
| 1 | 2 | 3 | 4 |
|---|---|---|---|

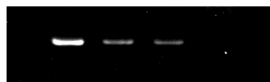

MMP-9

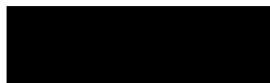

MMP-2

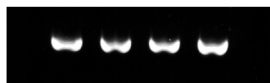

TIMP-1

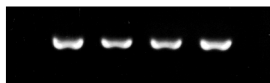

TIMP-2

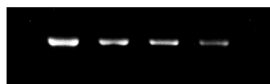

NCL

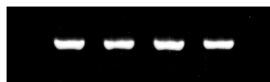

NPM

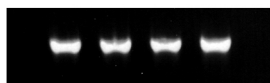

GAPDH

Supplement: MOESM11 [file 9462068]
